# Supplementary material for: Involvement of the adaptor protein 3 complex in lignocellulase secretion in Neurospora crassa revealed by comparative genomic screening
Source: PubMed Central journal article supplement (PMC4545925; doi:10.1186/s13068-015-0302-3), 2015-08-20
Supplement: 13068_2015_302_MOESM3_ESM.pdf [file 13068_2015_302_MOESM3_ESM.pdf]

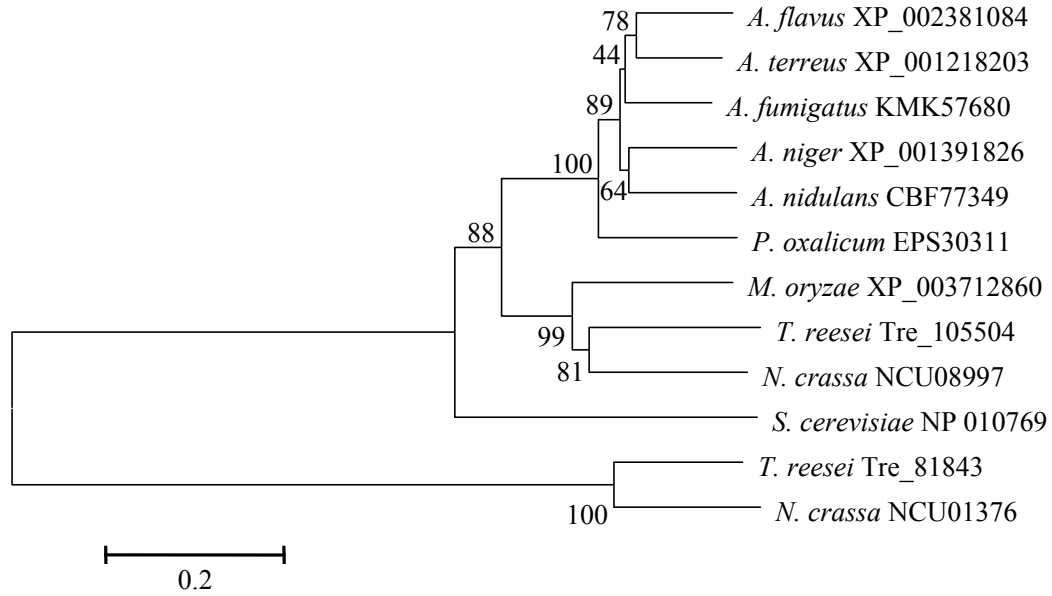

**Figure S4 Phylogenetic analysis of the alkaline phosphatase protein.** Amino acid sequences were obtained from the NCBI database based on ortholog calling using the localized blastp program. The phylogenetic analysis was done with MEGA 6 using the maximum likelihood method and bootstrap analysis (1,000 replicates) of the ClustalW alignment.
