# Supplementary material for: Involvement of the adaptor protein 3 complex in lignocellulase secretion in Neurospora crassa revealed by comparative genomic screening
Source: PubMed Central journal article supplement (PMC4545925; doi:10.1186/s13068-015-0302-3), 2015-08-20
Supplement: 13068_2015_302_MOESM4_ESM.pdf [file 13068_2015_302_MOESM4_ESM.pdf]

**Table S1 Primer used in this study**

| Primers    | Sequences (5'-3')                         | Purpose      |
|------------|-------------------------------------------|--------------|
| Actin-F    | CGAGCAGGAGATTCAGACC                       | qPCR         |
| Actin-R    | GCCAGATTCGAGACCAAG                        | qPCR         |
| NCU08189-F | CAAGATTGATGGCGTGGGACTC                    | qPCR         |
| NCU08189-R | CGGCATCTCCAACCTCACATC                     | qPCR         |
| NCU01900-F | CGTGACAAGCAGGGCATCTTC                     | qPCR         |
| NCU01900-R | CGCCTCGCCATCATCATCAAC                     | qPCR         |
| NCU02343-F | GGGAAGCAGCGTGTTC AAG                      | qPCR         |
| NCU02343-R | CCGTCAGGACCGTCAGTGTAG                     | qPCR         |
| NCU07225-F | AACGAGGCTGGCGGTCAG                        | qPCR         |
| NCU07225-R | AGACGGCGAGGTACGAGTTG                      | qPCR         |
| NCU05924-F | AATGTAAAGGAGGTTGCGGTCAC                   | qPCR         |
| NCU05924-R | CACGAGTCCGAATCACGAACAC                    | qPCR         |
| NCU09652-F | GGCGACATCGTGGAGATAGAG                     | qPCR         |
| NCU09652-R | CAGCCAATCGTCCTTCCAATAAC                   | qPCR         |
| NCU00762-F | CCAGTACCTCGACTCCGATAGC                    | qPCR         |
| NCU00762-R | TGGCACCACCAGCGAACTC                       | qPCR         |
| NCU07340-F | CTATGGCGGTACTTGGGATGC                     | qPCR         |
| NCU07340-R | CAGCGGAGTCCTTGATGAACTG                    | qPCR         |
| NCU09680-F | CCAACGGCGAGTTCTCCATC                      | qPCR         |
| NCU09680-R | GACGAGGTTAGCAAGCGAGTC                     | qPCR         |
| NCU04952-F | CGTAACTGGGAGGGCTTTGGTC                    | qPCR         |
| NCU04952-R | GCGGTTTGTCTCCTGTTCGTTG                    | qPCR         |
| ap3m-F     | <u>TCTAGA</u> ATGAACGGTGTTCATCGAGGC       | Gene cloning |
| ap3m-R     | <u>TTAATTAAG</u> CACCTAATCTCCACGCCC       | Gene cloning |
| Pnative-F  | <u>GCGGCCGC</u> AGCAGTCTTCGCTAAGGAACATC   | Gene cloning |
| Trap3m-F   | CTAG <u>TCTAGA</u> ATGAACGGCGTTATTGAAG    | Gene cloning |
| Trap3m-R   | <u>CCTTAATTAAG</u> CAGCGAATCTCTACTCCTCCCT | Gene cloning |

Underlined regions represent the restriction enzyme sites.
