# Supplementary material for: Involvement of the adaptor protein 3 complex in lignocellulase secretion in Neurospora crassa revealed by comparative genomic screening
Source: Springer Nature journal article supplement (doi:10.1186/s13068-015-0302-3), 2015-08-19
Supplement: MOESM1 [file 13068_2015_302_MOESM1_ESM.pdf]

```

1  MNGV I EALH I YDDNRNP I LSHYTGRLPSASHLLALYLEHPFPRPSL I YLPNANP PTLVFSLTHSNLLFL
10
20
30
40
50
60
70
80
ATSSTE I EPLLVEFLHRI VDAFEDFVGAPLLAVKLENNYDV I AQLLTEMCDAGTVSTTEPNALREVVEM
90
100
110
120
130
140
150
EGWDKLLGS I NLPGKSP LNTTPAAPSL I AANTPAV VPWRRANVRHTSNELYADVVELSVTLAPSGRPLA
160
170
180
190
200
210
220
AFANGT I AFTSKVSGVPDVLVTLGSPSGKHNI GGMELPVFHPCVRLARWNERPGELSF I PPDGRF ILAG
230
240
250
260
270
280
290
YEVDLLPFTSGKSGSVSSNNLKL PVNLEMKTGLGPVGSEFEVRLQTNK I FGTPNSSAVSQLSRAGVPGR I
300
310
320
330
340
350
360
SSPHPGSPSSPLDDLI VTIPLPEDVRNLSDI RPSRGDASFNRAEGRLEWH I PAKE I SGPTSHFGLHCTV
370
380
390
400
410
420
430
VGSLADDEEEEFDP TGF GFGTIDYAYNEPYQSTAVKSGKDKAGADDEQDPKKT AQNK I LMPSSAAVSFSVK
440
450
460
470
480
490
500
QWLASGLKTES I VLDSRKSRGLSEGVPKYKGVKYLTVSKGGTYGSC I AVLTVDSFRRL EPM I PSNPMPEP
510
520
530
540
550
560
570
SPRQLRGYP PPA TVL I VTKGDPLGSTVLSAPTMLFAASVSNASEL TRALRCCAPASGASSAATCPVRWSS
580
590
600
610
620
630
640
SRPGR PR TATFFPGQGVQKVGMLSPWLEAFPATASH I QE I DDVAGFK I SDV I ONGPSKVLTQT IMAQPA
650
660
670
680
690
700
710
IMATSI F I LRT I LEREFDFRVADHFDVT L GHS LGEFTALVAGGYLAFEDSYVLVORHAAAMSEATKKATQE
720
730
740
750
760
770
780
YGGEYGMVA V I TEPEYMQPL I KAT R D FVGHSSDGSKSESSEDVPP I EQVLTAN I NSKNQ I VLSGNMER I K
790
800
810
820
830
840
850
TL I AHVROFLGHDPRAVRLHSDSPFHSP I MKPAV I VMKN I LAKKSRVPGREDED M VTFPGLMPC I SNVSA
860
870
880
890
900
910
920
RPFESKEQLKDLLARGCLETVHWWASTKYLDQEEKVRHWG I GPGKVGRNLV GKEVGMRGKDLVKGGGWV
930
940
950
960
970
980
990
1000
A I TDPFEVEEVLRLGLEETAN I VDDEE *

```

**Figure S1 Protein sequence of tre53811 from *Trichoderma reesei* QM6a.** This protein had three domains. First, the clathrin adaptor complex small chain, marked in red, followed by the adaptor protein (AP) complex AP-3 medium  $\mu$ 3 subunit, marked in green, and lastly the malonyl CoA-acyl carrier protein transacylase, marked in blue. This protein contained 1007 amino acids.
